# Supplementary material
Source: PubMed Central journal article supplement (PMC4434726)
Supplement: pnas.201502057SI.pdf [file pnas.201502057SI.pdf]

# Supporting Information

Wong et al. 10.1073/pnas.1502057112

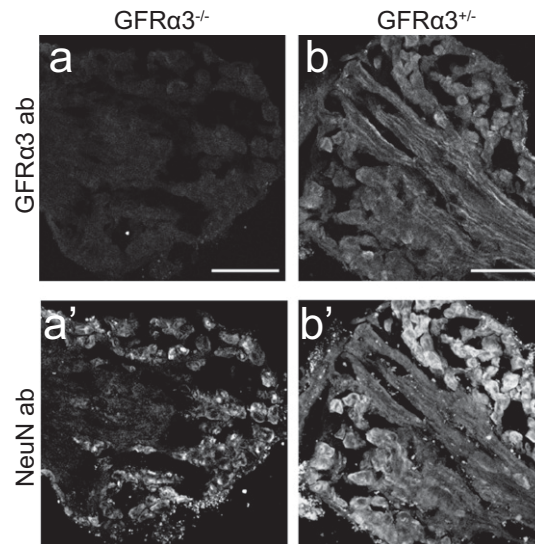

**Fig. S1.** (A and B) Cross-sections through DRGs of  $GFR\alpha3^{-/-}$  mice and  $GFR\alpha3^{+/+}$  littermates immunolabeled with the  $GFR\alpha3$  antibody.  $GFR\alpha3$  staining was widespread in the  $GFR\alpha3^{+/+}$  DRG. In contrast, there was a complete lack of  $GFR\alpha3$  staining in the DRG of the  $GFR\alpha3^{-/-}$  mice, indicating that the  $GFR\alpha3$  antibody is specific. (A' and B') Staining of the same DRG tissue with an antibody to NeuN. There was no decrease in the number of DRG neurons in  $GFR\alpha3^{-/-}$  mice (1, 2). (Scale bars: 100  $\mu\text{m}$ .)

1. Nishino J, et al. (1999) GFR alpha3, a component of the artemin receptor, is required for migration and survival of the superior cervical ganglion. *Neuron* 23(4):725–736.
2. Honma Y, et al. (2002) Artemin is a vascular-derived neurotrophic factor for developing sympathetic neurons. *Neuron* 35(2):267–282.

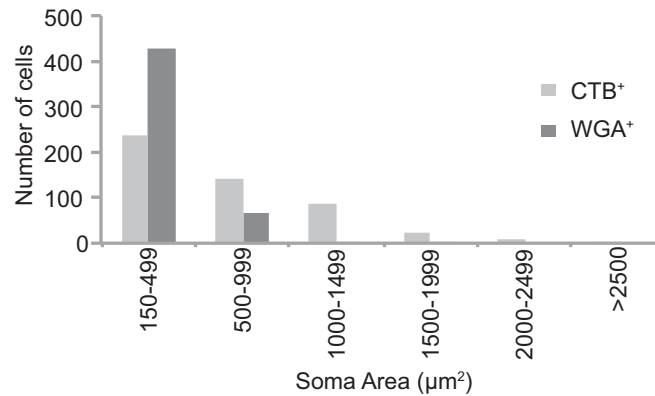

**Fig. S2.** Histogram showing the size distribution of  $CTB^+$  and  $WGA^+$  neurons ( $n = 500$ ). The number of neurons in each 500- $\mu\text{m}^2$  bin was counted. Consistent with previous reports (1),  $CTB^+$  cells were larger than  $WGA^+$  cells on average.

1. LaMotte CC, Kapadia SE, Shapiro CM (1991) Central projections of the sciatic, saphenous, median, and ulnar nerves of the rat demonstrated by transganglionic transport of cholera-agenoid-HRP (B-HRP) and wheat germ agglutinin-HRP (WGA-HRP). *J Comp Neurol* 311(4):546–562.

**Table S1. Primers (with sequences and melting temperatures) used for qPCR assays**

| Gene         | Forward primer (5'-3') | T <sub>m</sub> , °C | Reverse primer (5'-3') | T <sub>m</sub> , °C |
|--------------|------------------------|---------------------|------------------------|---------------------|
| <i>GFRα3</i> | CCTTCTGAATGGAAGGTGAAGA | 54.4                | TGGAGACAGTGCTAGGAGTTA  | 54.7                |
| <i>GAPDH</i> | CCCTTCATTGACCTCACTACA  | 54.4                | GATGACCAGCTTCCCATTCT   | 54.6                |
| <i>HPRT</i>  | GACCTCTCGAAGTGTGGAT C  | 54.7                | TCAAATCCCTGAAGTGCTCAT  | 54.1                |
